# Supplementary material for: Association of Physical Activity With Risk of Major Cardiovascular Diseases in Chinese Men and Women
Source: PubMed Central journal article supplement (PMC5814992; doi:10.1001/jamacardio.2017.4069), 2017-11-08
Supplement: jamacardiol-2-1349-s001.pdf [file jamacardiol-2-1349-s001.pdf]

## Supplementary Online Content

Bennett D, Du H, Clarke RJ, et al; China Kadoorie Biobank Study Collaborative Group. Association of physical activity with risk of major cardiovascular diseases in Chinese men and women. *JAMA Cardiol*. Published online November 8, 2017. doi:10.1001/jamacardio.2017.4069

- eTable 1:** Physical Activity Types, MET Values, Codes and Intensity Categories
- eTable 2:** Mean (SD) Levels of Plasma Biochemical Markers by Levels of Physical Activity in a Subset of CKB Participants
- eTable 3:** Types of Activity by Area and Gender
- eTable 4:** Adjusted HRs for Major Cardiovascular Diseases by Total, Occupational and Nonoccupational Physical Activity
- eTable 5:** Adjusted Event Rates for Major Cardiovascular Diseases by Baseline Levels of Total, Occupational and Nonoccupational Physical Activity
- eTable 6:** Estimated Regression Dilution Ratio for Total, Occupational and Nonoccupational Physical Activity
- eTable 7:** Adjusted HRs for Major Cardiovascular Diseases by Total, Occupational and Nonoccupational Physical Activity After Excluding Participants With Major Prior Chronic Diseases, Poor Self-Rated General Health and the First 3 Years of Follow-up
- eFigure 1:** Location of the 10 areas Included in the China Kadoorie Biobank
- eFigure 2:** Adjusted HRs for Major Vascular Events by Total Physical Activity, Stratified by A) Area and B) Gender
- eFigure 3:** Adjusted HRs for Major Coronary Events by Total Physical Activity, Stratified by A) Area and B) Gender
- eFigure 4:** Adjusted HRs for Ischemic Stroke Events by Total Physical Activity, Stratified by A) Area and B) Gender
- eFigure 5:** Adjusted HRs for Intracerebral Hemorrhage Events by Total Physical Activity, Stratified by A) Area and B) Gender
- eFigure 6:** Adjusted HRs for Cardiovascular Deaths by Total Physical Activity, Stratified by A) Area and b) Gender
- eFigure 7:** Adjusted HRs for Major Vascular Events A) Occupational and B) Nonoccupational Physical Activity, in Men and Women
- eFigure 8:** Adjusted HRs for Major Coronary Events A) Occupational and B) Nonoccupational Physical Activity, in Men and Women
- eFigure 9:** Adjusted HRs for Ischaemic Stroke Events A) Occupational and B) Nonoccupational Physical Activity, in Men and Women
- eFigure 10:** Adjusted HRs for Intracerebral Hemorrhage Events A) Occupational and B) Nonoccupational Physical Activity, in Men and Women

**eFigure 11:** Adjusted HRs for Cardiovascular Deaths A) Occupational and B) Nonoccupational Physical Activity, in Men and Women  
**eFigure 12:** Adjusted HRs for Major Vascular Events per 4 MET-h/day Higher Usual Total Physical Activity by Baseline Characteristics  
**eFigure 13:** Adjusted HRs for A) Major Coronary Events and B) Ischemic Stroke per 4 MET-h/day Higher Usual Total Physical Activity by Baseline Characteristics  
**eFigure 14:** Adjusted HRs for A) Intracerebral Hemorrhage and B) Cardiovascular Death per 4 MET-h/day Higher Usual Total Physical Activity by Baseline Characteristics  
**eFigure 15:** Effect on HRs for Major Vascular Events per 4 MET-h/day Higher Usual Total Physical Activity After Sequential Adjustment for Potential Confounders

This supplementary material has been provided by the authors to give readers additional information about their work.

**eTable 1: Physical activity types, MET values, codes and intensity categories\***

| Activity type                                                               | Intensity | MET | Codes*                                                                                                                                                                                                                                                                                                           |
|-----------------------------------------------------------------------------|-----------|-----|------------------------------------------------------------------------------------------------------------------------------------------------------------------------------------------------------------------------------------------------------------------------------------------------------------------|
| Heavy manual work                                                           | Vigorous  | 6.5 | 11477                                                                                                                                                                                                                                                                                                            |
| Manual work                                                                 | Moderate  | 4.5 | 11476                                                                                                                                                                                                                                                                                                            |
| Standing work                                                               | Moderate  | 3.8 | Mean of 11610 and 11630                                                                                                                                                                                                                                                                                          |
| Sedentary work                                                              | Low       | 1.8 | Mean of 11580, 11585, and 11590                                                                                                                                                                                                                                                                                  |
| Manual work in the farming season                                           | Vigorous  | 6.3 | Mean of 11145 and 11146                                                                                                                                                                                                                                                                                          |
| Semi-mechanized work in the farming season                                  | Moderate  | 3.4 | Mean of 11146 and 11147                                                                                                                                                                                                                                                                                          |
| Fully mechanized work in the farming season                                 | Low       | 2.4 | Mean of 11147 and 11170                                                                                                                                                                                                                                                                                          |
| Work outside the farming season                                             | Low       | 2   | 11147                                                                                                                                                                                                                                                                                                            |
| Walking                                                                     | Moderate  | 4   | 17270                                                                                                                                                                                                                                                                                                            |
| Bicycle                                                                     | Vigorous  | 6.8 | 1011                                                                                                                                                                                                                                                                                                             |
| Motorbike                                                                   | Moderate  | 3.5 | 16030                                                                                                                                                                                                                                                                                                            |
| Private or public transportation (such as bus, car, underground, and ferry) | Low       | 1.7 | Mean of 16010, 16015, and 16016                                                                                                                                                                                                                                                                                  |
| Household activity                                                          | Low       | 2.8 | Mean of 05030 <sup>†</sup> , 05040 <sup>†</sup> , 05035, 05055, 05070, 05090 <sup>†</sup> , 05092 <sup>†</sup> , 05184, 05197, and 05200                                                                                                                                                                         |
| Tai-Chi/qigong/leisure walking                                              | Moderate  | 3.3 | Mean of 15670 and 17160                                                                                                                                                                                                                                                                                          |
| Jogging/aerobic exercise                                                    | Vigorous  | 7.4 | Mean of 03015, 12020, and 12150                                                                                                                                                                                                                                                                                  |
| Ball games                                                                  | Moderate  | 5.5 | Mean of 15020 <sup>†</sup> , 15030 <sup>†</sup> , 15055, 15080, 15090, 15255, 15605 <sup>†</sup> , 15610 <sup>†</sup> , 15652, 15660, 15675, 15710 <sup>†</sup> , and 15711 <sup>†</sup>                                                                                                                         |
| Brisk walking/gymnastics/folk dancing                                       | Moderate  | 4.2 | Mean of 03025, 15300, and 17200                                                                                                                                                                                                                                                                                  |
| Swimming                                                                    | Vigorous  | 7.2 | Mean of 18230, 18240, and 18310                                                                                                                                                                                                                                                                                  |
| Other exercise, e.g. mountain walking, home exercise and rope jumping       | Moderate  | 5.9 | Mean of 02010, 02064, 04001, 04100, 15110 <sup>†</sup> , 15120 <sup>†</sup> , 15200, 15240, 15310, 15425 <sup>†</sup> , 15430 <sup>†</sup> , 15537, 15550 <sup>‡</sup> , 15551 <sup>‡</sup> , 15552 <sup>‡</sup> , 15580, 15590, 15730, 15732 <sup>‡</sup> , 15733 <sup>‡</sup> , 15734 <sup>‡</sup> , and 19030 |

MET: Metabolic equivalent of tasks.

\* Based on the 2011 Compendium of Physical Activities: a second update of codes and MET values. Ainsworth BE, et al. *Medicine and Science in Sports and Exercise*, 2011;43(8):1575-1581.

<sup>†</sup> Assigned 1/2 weight in calculating the mean MET value because the connecting two items represent one type of activity.

<sup>‡</sup> Assigned 1/3 weight in calculating the mean MET value because the connecting three items represent one type of activity.

**eTable 2: Mean (SD) levels of plasma biochemical markers by levels of physical activity in a subset of CKB participants**

| Biochemistry                           | No. of participants | Total physical activity (MET-h/day) |              |              |              |              | P-value for trend |
|----------------------------------------|---------------------|-------------------------------------|--------------|--------------|--------------|--------------|-------------------|
|                                        |                     | ≤9.1                                | 9.2 - 14.7   | 14.8 - 22.4  | 22.5 - 33.7  | ≥ 33.8       |                   |
| Total cholesterol, mmol/L              | 9282                | 4.7 (0.9)                           | 4.7 (0.9)    | 4.6 (0.9)    | 4.5 (0.9)    | 4.5 (0.9)    | <0.0001           |
| LDL-C, mmol/L                          | 9282                | 2.4 (0.7)                           | 2.4 (0.6)    | 2.3 (0.6)    | 2.2 (0.7)    | 2.3 (0.7)    | <0.0001           |
| HDL-C, mmol/L                          | 9282                | 1.2 (0.3)                           | 1.2 (0.3)    | 1.3 (0.3)    | 1.3 (0.3)    | 1.3 (0.3)    | <0.0001           |
| ApoB, mg/dl                            | 9282                | 84.0 (20.4)                         | 84.5 (19.5)  | 82.5 (19.1)  | 79.7 (19.8)  | 79.8 (20.3)  | <0.0001           |
| ApoA1, mg/dl                           | 9282                | 133.6 (22.9)                        | 134.7 (21.9) | 136.2 (21.5) | 137.7 (22.3) | 138.0 (22.8) | <0.0001           |
| Log triglycerides, log mmol/L          | 9282                | 0.6 (0.6)                           | 0.6 (0.6)    | 0.5 (0.5)    | 0.5 (0.6)    | 0.4 (0.6)    | <0.0001           |
| Log Lp(a), log nmol/L                  | 9282                | 3.0 (1.2)                           | 3.0 (1.1)    | 3.0 (1.1)    | 3.0 (1.1)    | 3.0 (1.2)    | 0.7385            |
| Fibrinogen, g/L                        | 5247                | 3.1 (0.7)                           | 3.1 (0.7)    | 3.1 (0.7)    | 3.1 (0.7)    | 3.1 (0.7)    | 0.0194            |
| Log CRP, log mg/L                      | 9282                | 0.2 (1.1)                           | 0.1 (1.0)    | -0.0 (1.0)   | -0.0 (1.0)   | -0.1 (1.0)   | <0.0001           |
| Log Gamma glutamyl tranferase, log u/L | 8412                | 3.1 (0.7)                           | 3.1 (0.7)    | 3.0 (0.6)    | 3.0 (0.7)    | 2.9 (0.7)    | <0.0001           |
| Albumin, g/L                           | 8538                | 42.2 (2.8)                          | 42.4 (2.7)   | 42.2 (2.6)   | 42.2 (2.7)   | 42.4 (2.8)   | 0.3488            |
| Creatinine, umol/L                     | 9282                | 65.5 (15.9)                         | 64.5 (15.2)  | 62.8 (14.9)  | 63.1 (15.5)  | 61.8 (15.8)  | <0.0001           |
| Cystatin-C, mg/L                       | 8117                | 0.9 (0.2)                           | 0.8 (0.2)    | 0.8 (0.2)    | 0.8 (0.2)    | 0.8 (0.2)    | <0.0001           |

All values are adjusted for age, sex, and area where appropriate.

To convert the values of total, LDL-C, HDL-C to milligrams per decilitre, divide by 0.0259.

**eTable 3: Types of activity by area and gender**

|                                            | Rural<br>Mean (SD)*  |                        | Urban<br>Mean (SD)* |                        | Total<br>Mean (SD)   |                        |
|--------------------------------------------|----------------------|------------------------|---------------------|------------------------|----------------------|------------------------|
|                                            | Men<br>(n = 113,983) | Women<br>(n = 162,593) | Men<br>(n = 85,035) | Women<br>(n = 125,723) | Men<br>(n = 199,018) | Women<br>(n = 288,316) |
| <b>Total physical activity (MET-h/day)</b> | <b>24.8 (12.9)</b>   | <b>22.2 (12.9)</b>     | <b>20.4 (12.9)</b>  | <b>18.5 (12.9)</b>     | <b>22.9 (12.8)</b>   | <b>20.6 (12.8)</b>     |
| Non-occupational                           | 5.3 (4.4)            | 10.3 (4.4)             | 5.9 (4.4)           | 9.6 (4.4)              | 5.5 (4.4)            | 10.0 (4.4)             |
| Occupational                               | 19.5 (12.5)          | 11.9 (12.5)            | 14.5 (12.5)         | 8.9 (12.5)             | 17.4 (12.4)          | 10.6 (12.4)            |
| <b>Sedentary leisure-time, hours/day</b>   | <b>3.0 (1.5)</b>     | <b>2.9 (1.5)</b>       | <b>3.2 (1.5)</b>    | <b>3.0 (1.5)</b>       | <b>3.1 (1.5)</b>     | <b>2.9 (1.5)</b>       |

\*All values were adjusted for age.

**eTable 4: Adjusted HRs for major cardiovascular diseases by total, occupational and non-occupational physical activity**

| Baseline physical activity (MET-h/day) | Major coronary events |                    | Ischaemic stroke |                    | Intracerebral haemorrhage |                    | Cardiovascular deaths |                    | Major vascular events |                    |
|----------------------------------------|-----------------------|--------------------|------------------|--------------------|---------------------------|--------------------|-----------------------|--------------------|-----------------------|--------------------|
|                                        | No. of events         | HR* (95% CI)       | No. of events    | HR* (95% CI)       | No. of events             | HR* (95% CI)       | No. of events         | HR* (95% CI)       | No. of events         | HR* (95% CI)       |
| <b>Total</b>                           |                       |                    |                  |                    |                           |                    |                       |                    |                       |                    |
| ≤9.1                                   | 2183                  | 1.00 (0.95 - 1.05) | 9364             | 1.00 (0.98 - 1.02) | 1656                      | 1.00 (0.95 - 1.06) | 3611                  | 1.00 (0.96 - 1.04) | 13229                 | 1.00 (0.98 - 1.02) |
| 9.2 - 14.7                             | 1197                  | 0.83 (0.78 - 0.87) | 6828             | 0.93 (0.91 - 0.95) | 1185                      | 0.86 (0.81 - 0.92) | 1830                  | 0.75 (0.72 - 0.79) | 9177                  | 0.90 (0.88 - 0.92) |
| 14.8 - 22.4                            | 702                   | 0.74 (0.69 - 0.80) | 4176             | 0.86 (0.84 - 0.89) | 882                       | 0.78 (0.73 - 0.83) | 1206                  | 0.67 (0.63 - 0.71) | 5846                  | 0.83 (0.81 - 0.86) |
| 22.5 - 33.7                            | 586                   | 0.71 (0.65 - 0.78) | 2929             | 0.83 (0.80 - 0.86) | 827                       | 0.70 (0.65 - 0.75) | 1061                  | 0.60 (0.56 - 0.64) | 4408                  | 0.79 (0.76 - 0.81) |
| ≥ 33.8                                 | 414                   | 0.69 (0.62 - 0.77) | 2350             | 0.79 (0.75 - 0.82) | 702                       | 0.77 (0.71 - 0.83) | 729                   | 0.59 (0.55 - 0.64) | 3524                  | 0.77 (0.74 - 0.80) |
| P for non-linearity                    |                       | <0.0001            |                  | 0.0004             |                           | 0.0001             |                       | <0.0001            |                       | <0.0001            |
| <b>Occupational†</b>                   |                       |                    |                  |                    |                           |                    |                       |                    |                       |                    |
| 0                                      | 2743                  | 1.00 (0.94 - 1.07) | 13352            | 1.00 (0.97 - 1.03) | 1954                      | 1.00 (0.94 - 1.07) | 4164                  | 1.00 (0.95 - 1.05) | 18020                 | 1.00 (0.98 - 1.03) |
| 0.1 - 5.9                              | 648                   | 0.77 (0.70 - 0.84) | 3467             | 0.89 (0.86 - 0.93) | 871                       | 0.87 (0.81 - 0.94) | 1276                  | 0.75 (0.70 - 0.80) | 5012                  | 0.87 (0.84 - 0.90) |
| 6.0 - 13.8                             | 698                   | 0.70 (0.65 - 0.76) | 3577             | 0.83 (0.81 - 0.86) | 949                       | 0.75 (0.71 - 0.80) | 1260                  | 0.66 (0.62 - 0.69) | 5312                  | 0.80 (0.78 - 0.82) |
| 13.9 - 25.7                            | 548                   | 0.69 (0.63 - 0.76) | 2713             | 0.82 (0.79 - 0.85) | 833                       | 0.70 (0.65 - 0.75) | 1054                  | 0.61 (0.58 - 0.66) | 4150                  | 0.77 (0.75 - 0.80) |
| ≥ 25.8                                 | 445                   | 0.68 (0.62 - 0.76) | 2538             | 0.79 (0.75 - 0.82) | 645                       | 0.75 (0.69 - 0.82) | 683                   | 0.59 (0.55 - 0.65) | 3690                  | 0.77 (0.74 - 0.79) |
| P for non-linearity                    |                       | <0.0001            |                  | 0.54               |                           | 0.0001             |                       | <0.0001            |                       | <0.0001            |
| <b>Non-occupational†</b>               |                       |                    |                  |                    |                           |                    |                       |                    |                       |                    |
| 0 - 3.9                                | 1273                  | 1.00 (0.94 - 1.07) | 5358             | 1.00 (0.97 - 1.03) | 1139                      | 1.00 (0.93 - 1.07) | 2047                  | 1.00 (0.95 - 1.05) | 7801                  | 1.00 (0.97 - 1.03) |
| 4.0 - 6.5                              | 1020                  | 0.88 (0.82 - 0.93) | 4921             | 0.94 (0.91 - 0.96) | 977                       | 0.91 (0.85 - 0.97) | 1685                  | 0.89 (0.85 - 0.93) | 6992                  | 0.92 (0.90 - 0.95) |
| 6.6 - 8.4                              | 1027                  | 0.86 (0.81 - 0.91) | 5211             | 0.93 (0.90 - 0.95) | 1089                      | 0.89 (0.84 - 0.95) | 1795                  | 0.85 (0.81 - 0.89) | 7369                  | 0.90 (0.88 - 0.93) |
| 8.5 - 11.6                             | 881                   | 0.80 (0.75 - 0.85) | 4930             | 0.90 (0.88 - 0.93) | 1025                      | 0.89 (0.84 - 0.95) | 1485                  | 0.78 (0.74 - 0.82) | 6876                  | 0.88 (0.86 - 0.90) |
| ≥ 11.7                                 | 881                   | 0.78 (0.72 - 0.84) | 5227             | 0.88 (0.85 - 0.90) | 1022                      | 0.84 (0.78 - 0.90) | 1425                  | 0.71 (0.67 - 0.75) | 7146                  | 0.85 (0.83 - 0.87) |
| P for non-linearity                    |                       | 0.41               |                  | 0.99               |                           | 0.62               |                       | 0.77               |                       |                    |

\* All HRs are adjusted for stratified by age at risk, sex, and region and adjusted for income, education, BMI, alcohol, smoking, SBP, fresh fruit intake, sedentary leisure time, and self-rated health.

† Occupational physical activity additionally adjusted for non-occupational physical activity. Non-occupational physical activity additionally adjusted for occupational physical activity.

**eTable 5: Adjusted event rates for major cardiovascular diseases by baseline levels of total, occupational and non-occupational physical activity**

| Baseline physical activity (MET-h/day) | Major coronary events |                      | Ischaemic stroke |                      | Intracerebral haemorrhage |                      | Cardiovascular deaths |                      | Major vascular events |                      |
|----------------------------------------|-----------------------|----------------------|------------------|----------------------|---------------------------|----------------------|-----------------------|----------------------|-----------------------|----------------------|
|                                        | No. of events         | Event rate* (95% CI) | No. of events    | Event rate* (95% CI) | No. of events             | Event rate* (95% CI) | No. of events         | Event rate* (95% CI) | No. of events         | Event rate* (95% CI) |
| <b>Total</b>                           |                       |                      |                  |                      |                           |                      |                       |                      |                       |                      |
| ≤ 9.1                                  | 2183                  | 1.66 (1.56 - 1.76)   | 9364             | 7.53 (7.33 - 7.73)   | 1656                      | 1.87 (1.72 - 2.01)   | 3611                  | 3.12 (2.96 - 3.28)   | 13229                 | 11.35 (11.1 - 11.63) |
| 9.2 - 14.7                             | 1197                  | 1.32 (1.22 - 1.41)   | 6828             | 6.92 (6.73 - 7.11)   | 1185                      | 1.46 (1.35 - 1.56)   | 1830                  | 2.10 (1.98 - 2.22)   | 9177                  | 9.74 (9.50 - 9.98)   |
| 14.8 - 22.4                            | 702                   | 1.11 (1.02 - 1.20)   | 4176             | 6.49 (6.27 - 6.71)   | 882                       | 1.27 (1.17 - 1.36)   | 1206                  | 1.84 (1.72 - 1.96)   | 5846                  | 8.99 (8.73 - 9.25)   |
| 22.5 - 33.7                            | 586                   | 1.11 (0.91 - 1.31)   | 2929             | 6.49 (6.07 - 6.92)   | 827                       | 1.18 (1.03 - 1.34)   | 1061                  | 1.63 (1.42 - 1.84)   | 4408                  | 8.91 (8.41 - 9.41)   |
| ≥ 33.8                                 | 414                   | 0.96 (0.75 - 1.17)   | 2350             | 5.88 (5.31 - 6.46)   | 702                       | 1.37 (1.16 - 1.57)   | 729                   | 1.69 (1.39 - 2.00)   | 3524                  | 8.42 (7.74 - 9.09)   |
| <b>Occupational</b>                    |                       |                      |                  |                      |                           |                      |                       |                      |                       |                      |
| 0                                      | 2743                  | 1.67 (1.54 - 1.80)   | 13352            | 7.41 (7.18 - 7.64)   | 1954                      | 1.89 (1.70 - 2.08)   | 4164                  | 3.13 (2.93 - 3.33)   | 18371                 | 11.50 (11.1 - 11.85) |
| 0.1 - 5.9                              | 648                   | 0.91 (0.76 - 1.06)   | 3467             | 6.95 (6.06 - 7.84)   | 871                       | 1.45 (1.25 - 1.66)   | 1276                  | 1.91 (1.71 - 2.12)   | 5085                  | 9.79 (8.85 - 10.73)  |
| 6.0 - 13.8                             | 698                   | 0.95 (0.86 - 1.04)   | 3577             | 6.06 (5.70 - 6.41)   | 949                       | 1.22 (1.11 - 1.32)   | 1260                  | 1.73 (1.51 - 1.95)   | 5425                  | 8.59 (8.16 - 9.02)   |
| 13.9 - 25.7                            | 548                   | 1.20 (0.76 - 1.65)   | 2713             | 7.29 (6.36 - 8.22)   | 833                       | 1.26 (1.00 - 1.52)   | 1054                  | 1.79 (1.34 - 2.24)   | 4230                  | 9.93 (8.90 - 10.97)  |
| ≥ 25.8                                 | 445                   | 1.22 (0.83 - 1.61)   | 2538             | 6.02 (5.45 - 6.58)   | 645                       | 1.43 (1.07 - 1.78)   | 683                   | 2.20 (1.50 - 2.91)   | 3771                  | 9.20 (8.28 - 10.12)  |
| <b>Non-occupational</b>                |                       |                      |                  |                      |                           |                      |                       |                      |                       |                      |
| 0 - 3.9                                | 1273                  | 1.65 (1.50 - 1.80)   | 5358             | 7.72 (7.33 - 8.11)   | 1139                      | 1.93 (1.64 - 2.22)   | 2047                  | 3.30 (2.95 - 3.65)   | 7964                  | 11.81 (11.3 - 12.35) |
| 4.0 - 6.5                              | 1020                  | 1.40 (1.29 - 1.50)   | 4921             | 6.96 (6.73 - 7.18)   | 977                       | 1.39 (1.27 - 1.50)   | 1685                  | 2.39 (2.25 - 2.53)   | 7132                  | 10.11 (9.83 - 10.39) |
| 6.6 - 8.4                              | 1027                  | 1.29 (1.21 - 1.38)   | 5211             | 6.83 (6.63 - 7.03)   | 1089                      | 1.45 (1.36 - 1.55)   | 1795                  | 2.28 (2.16 - 2.40)   | 7490                  | 9.83 (9.58 - 10.07)  |
| 8.5 - 11.6                             | 881                   | 1.23 (1.14 - 1.32)   | 4930             | 6.59 (6.39 - 6.80)   | 1025                      | 1.39 (1.29 - 1.49)   | 1485                  | 2.03 (1.91 - 2.14)   | 7013                  | 9.49 (9.24 - 9.74)   |
| ≥ 11.7                                 | 881                   | 1.21 (1.09 - 1.33)   | 5227             | 6.48 (6.23 - 6.73)   | 1022                      | 1.26 (1.14 - 1.37)   | 1425                  | 1.92 (1.76 - 2.07)   | 7283                  | 9.24 (8.92 - 9.55)   |

\*All event rates are per 1,000 person-years and are adjusted for age, sex, and area.

**eTable 6: Estimated regression dilution ratio for total, occupational and non-occupational physical activity**

| <b>Baseline physical activity groups</b> | <b>Mean Baseline Physical activity (MET-h/day)</b> | <b>Mean First Re-survey Physical activity (MET-h/day)</b> | <b>Ratio of the ranges (MacMahon-Peto ) regression dilution ratio estimate</b> | <b>Self-correlation regression dilution ratio estimate</b> |
|------------------------------------------|----------------------------------------------------|-----------------------------------------------------------|--------------------------------------------------------------------------------|------------------------------------------------------------|
| <b>Total</b>                             |                                                    |                                                           |                                                                                |                                                            |
| ≤9.1 (i)                                 | 5.95                                               | 12.02                                                     |                                                                                |                                                            |
| 9.2 -14.7 (ii)                           | 11.97                                              | 15.09                                                     |                                                                                |                                                            |
| 14.8 - 22.4 (iii)                        | 18.23                                              | 19.34                                                     | 0.53                                                                           | 0.51                                                       |
| 22.5 - 33.7 (iv)                         | 27.85                                              | 25.44                                                     |                                                                                |                                                            |
| ≥33.8 (v)                                | 43.58                                              | 31.98                                                     |                                                                                |                                                            |
| <b>Difference (v–i)</b>                  | <b>37.63</b>                                       | <b>19.96</b>                                              |                                                                                |                                                            |
| <b>Occupational</b>                      |                                                    |                                                           |                                                                                |                                                            |
| 0 (i)                                    | 0                                                  | 2.43                                                      |                                                                                |                                                            |
| 0.1 - 5.9 (ii)                           | 3.15                                               | 8.73                                                      |                                                                                |                                                            |
| 6.0 - 13.8 (iii)                         | 9.97                                               | 12.37                                                     | 0.63                                                                           | 0.57                                                       |
| 13.9 - 25.7 (iv)                         | 18.85                                              | 17.95                                                     |                                                                                |                                                            |
| ≥ 25.8 (iv)                              | 35.71                                              | 25.08                                                     |                                                                                |                                                            |
| <b>Difference (v–i)</b>                  | <b>35.71</b>                                       | <b>22.65</b>                                              |                                                                                |                                                            |
| <b>Non-occupational</b>                  |                                                    |                                                           |                                                                                |                                                            |
| 0 - 3.9 (i)                              | 2.11                                               | 4.58                                                      |                                                                                |                                                            |
| 4.0 - 6.5 (ii)                           | 5.30                                               | 6.74                                                      |                                                                                |                                                            |
| 6.6 - 8.4 (iii)                          | 7.70                                               | 8.24                                                      | 0.50                                                                           | 0.48                                                       |
| 8.5 - 11.6 (iv)                          | 10.08                                              | 9.20                                                      |                                                                                |                                                            |
| ≥11.7 (v)                                | 15.53                                              | 11.15                                                     |                                                                                |                                                            |
| <b>Difference (v–i)</b>                  | <b>13.42</b>                                       | <b>6.57</b>                                               |                                                                                |                                                            |



**eTable 7: Adjusted HRs\* for major cardiovascular diseases by total, occupational and non-occupational physical activity after excluding participants with major prior chronic diseases<sup>†</sup>, poor self-rated general health and the first three years of follow-up**

| Baseline physical activity (MET-h/day) | Major coronary events |                    | Ischaemic stroke |                    | Intracerebral haemorrhage |                    | Cardiovascular deaths |                    | Major vascular events |                    |
|----------------------------------------|-----------------------|--------------------|------------------|--------------------|---------------------------|--------------------|-----------------------|--------------------|-----------------------|--------------------|
|                                        | No. of events         | HR* (95% CI)       | No. of events    | HR* (95% CI)       | No. of events             | HR* (95% CI)       | No. of events         | HR* (95% CI)       | No. of events         | HR* (95% CI)       |
| <b>Total</b>                           |                       |                    |                  |                    |                           |                    |                       |                    |                       |                    |
| ≤9.1                                   | 1334                  | 1.00 (0.94 - 1.07) | 6679             | 1.00 (0.97 - 1.03) | 964                       | 1.00 (0.93 - 1.08) | 1985                  | 1.00 (0.95 - 1.05) | 8876                  | 1.00 (0.98 - 1.02) |
| 9.2 - 14.7                             | 819                   | 0.87 (0.81 - 0.93) | 5068             | 0.91 (0.89 - 0.94) | 845                       | 0.95 (0.89 - 1.02) | 1180                  | 0.80 (0.76 - 0.85) | 6683                  | 0.91 (0.89 - 0.93) |
| 14.8 - 22.4                            | 499                   | 0.82 (0.75 - 0.89) | 3213             | 0.86 (0.83 - 0.89) | 609                       | 0.83 (0.76 - 0.89) | 785                   | 0.73 (0.68 - 0.79) | 4355                  | 0.85 (0.83 - 0.88) |
| 22.5 - 33.7                            | 413                   | 0.76 (0.68 - 0.85) | 2273             | 0.81 (0.78 - 0.85) | 599                       | 0.76 (0.69 - 0.83) | 708                   | 0.64 (0.59 - 0.69) | 3314                  | 0.79 (0.76 - 0.82) |
| ≥33.8                                  | 317                   | 0.78 (0.69 - 0.88) | 1880             | 0.77 (0.74 - 0.81) | 537                       | 0.84 (0.77 - 0.93) | 525                   | 0.66 (0.60 - 0.73) | 2777                  | 0.79 (0.76 - 0.82) |
| P for non-linearity                    |                       | 0.064              |                  | 0.0004             |                           | <0.0001            |                       | <0.0001            |                       | 0.0005             |
| <b>Occupational</b>                    |                       |                    |                  |                    |                           |                    |                       |                    |                       |                    |
| 0                                      | 1754                  | 1.00 (0.92 - 1.09) | 9595             | 1.00 (0.97 - 1.04) | 1201                      | 1.00 (0.92 - 1.09) | 2406                  | 1.00 (0.94 - 1.07) | 12409                 | 1.00 (0.97 - 1.03) |
| 0.1 - 5.9                              | 395                   | 0.77 (0.68 - 0.86) | 2583             | 0.88 (0.84 - 0.92) | 587                       | 0.93 (0.85 - 1.02) | 751                   | 0.76 (0.70 - 0.83) | 3553                  | 0.87 (0.84 - 0.91) |
| 6.0 - 13.8                             | 489                   | 0.76 (0.70 - 0.83) | 2742             | 0.81 (0.78 - 0.85) | 646                       | 0.79 (0.73 - 0.85) | 788                   | 0.69 (0.64 - 0.74) | 3916                  | 0.81 (0.78 - 0.83) |
| 13.9 - 25.7                            | 396                   | 0.75 (0.67 - 0.83) | 2146             | 0.81 (0.77 - 0.85) | 618                       | 0.76 (0.69 - 0.82) | 740                   | 0.67 (0.62 - 0.73) | 3181                  | 0.79 (0.76 - 0.82) |
| ≥25.8                                  | 348                   | 0.75 (0.67 - 0.84) | 2047             | 0.77 (0.73 - 0.81) | 502                       | 0.82 (0.74 - 0.90) | 498                   | 0.66 (0.60 - 0.73) | 2946                  | 0.78 (0.75 - 0.81) |
| P for non-linearity                    |                       | 0.0036             |                  | 0.0002             |                           | 0.0043             |                       | 0.0002             |                       | <0.0001            |
| <b>Non-occupational</b>                |                       |                    |                  |                    |                           |                    |                       |                    |                       |                    |
| 0 - 3.9                                | 814                   | 1.00 (0.92 - 1.08) | 3969             | 1.00 (0.96 - 1.04) | 717                       | 1.00 (0.92 - 1.09) | 1170                  | 1.00 (0.93 - 1.07) | 5459                  | 1.00 (0.97 - 1.03) |
| 4.0 - 6.5                              | 689                   | 0.90 (0.83 - 0.97) | 3692             | 0.93 (0.90 - 0.96) | 670                       | 0.97 (0.90 - 1.05) | 1034                  | 0.92 (0.86 - 0.98) | 5064                  | 0.93 (0.91 - 0.96) |
| 6.6 - 8.4                              | 674                   | 0.88 (0.81 - 0.95) | 3885             | 0.90 (0.87 - 0.93) | 738                       | 0.95 (0.89 - 1.03) | 1106                  | 0.89 (0.84 - 0.94) | 5286                  | 0.90 (0.88 - 0.93) |
| 8.5 - 11.6                             | 593                   | 0.81 (0.74 - 0.88) | 3689             | 0.87 (0.84 - 0.90) | 720                       | 0.96 (0.89 - 1.03) | 943                   | 0.80 (0.75 - 0.86) | 5021                  | 0.88 (0.86 - 0.91) |
| ≥11.7                                  | 612                   | 0.82 (0.75 - 0.89) | 3878             | 0.84 (0.81 - 0.87) | 709                       | 0.89 (0.82 - 0.98) | 930                   | 0.72 (0.67 - 0.78) | 5175                  | 0.84 (0.82 - 0.87) |
| P for non-linearity                    |                       | 0.50               |                  | 0.49               |                           | 0.80               |                       | 0.28               |                       | 0.75               |

\* All HRs are stratified by age at risk, sex, and region and adjusted for income, education, alcohol, smoking, fresh fruit intake, sedentary leisure-time and mutually adjusted for other domain-specific physical activity when appropriate.

<sup>†</sup> Exclusions include prior history of CVD, tuberculosis, chronic obstructive pulmonary disease, emphysema or bronchitis, asthma, rheumatic heart disease and cancer.

**eFigure 1: The location of the 10 areas included in the China Kadoorie Biobank**

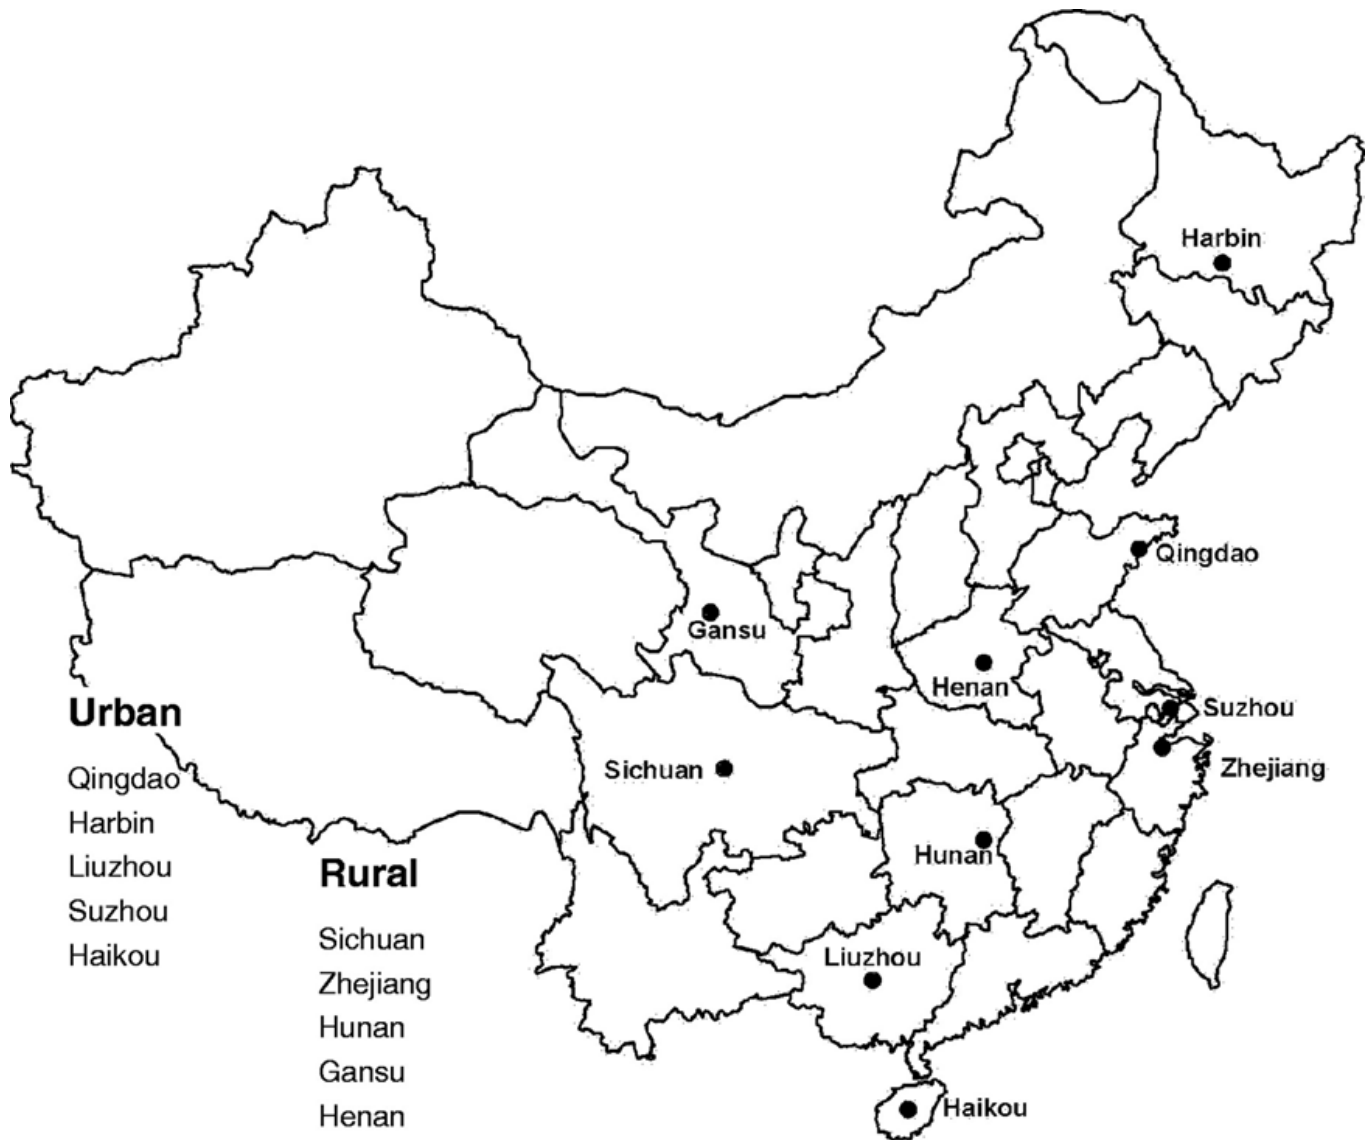

**eFigure 2: Adjusted HRs for major vascular events by total physical activity stratified by a) area and b) gender**

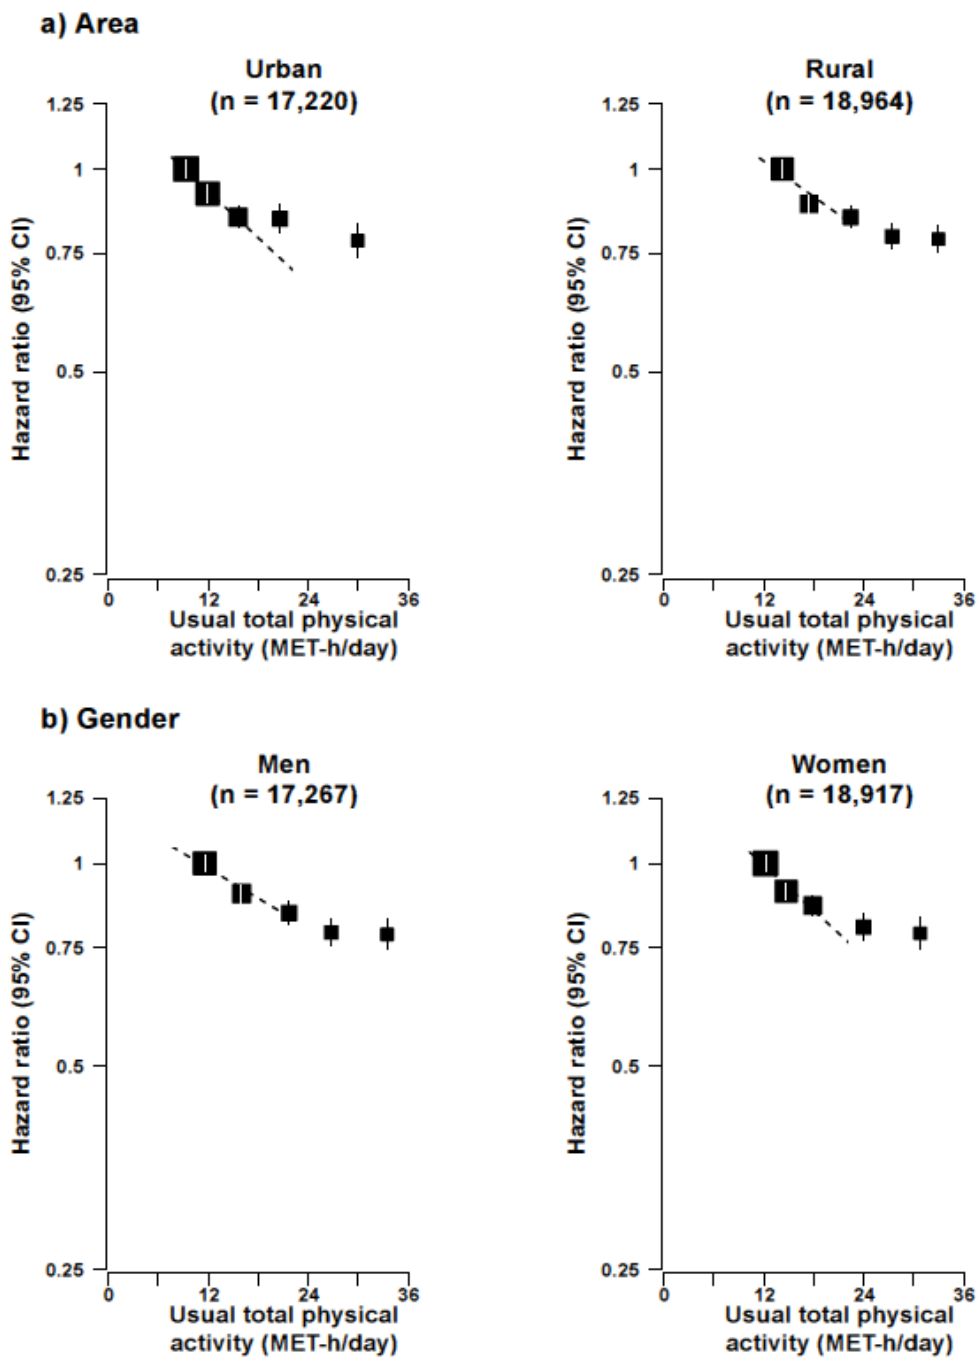

**eFigure 3: Adjusted HRs for major coronary events by total physical activity, stratified by a) area and b) gender**

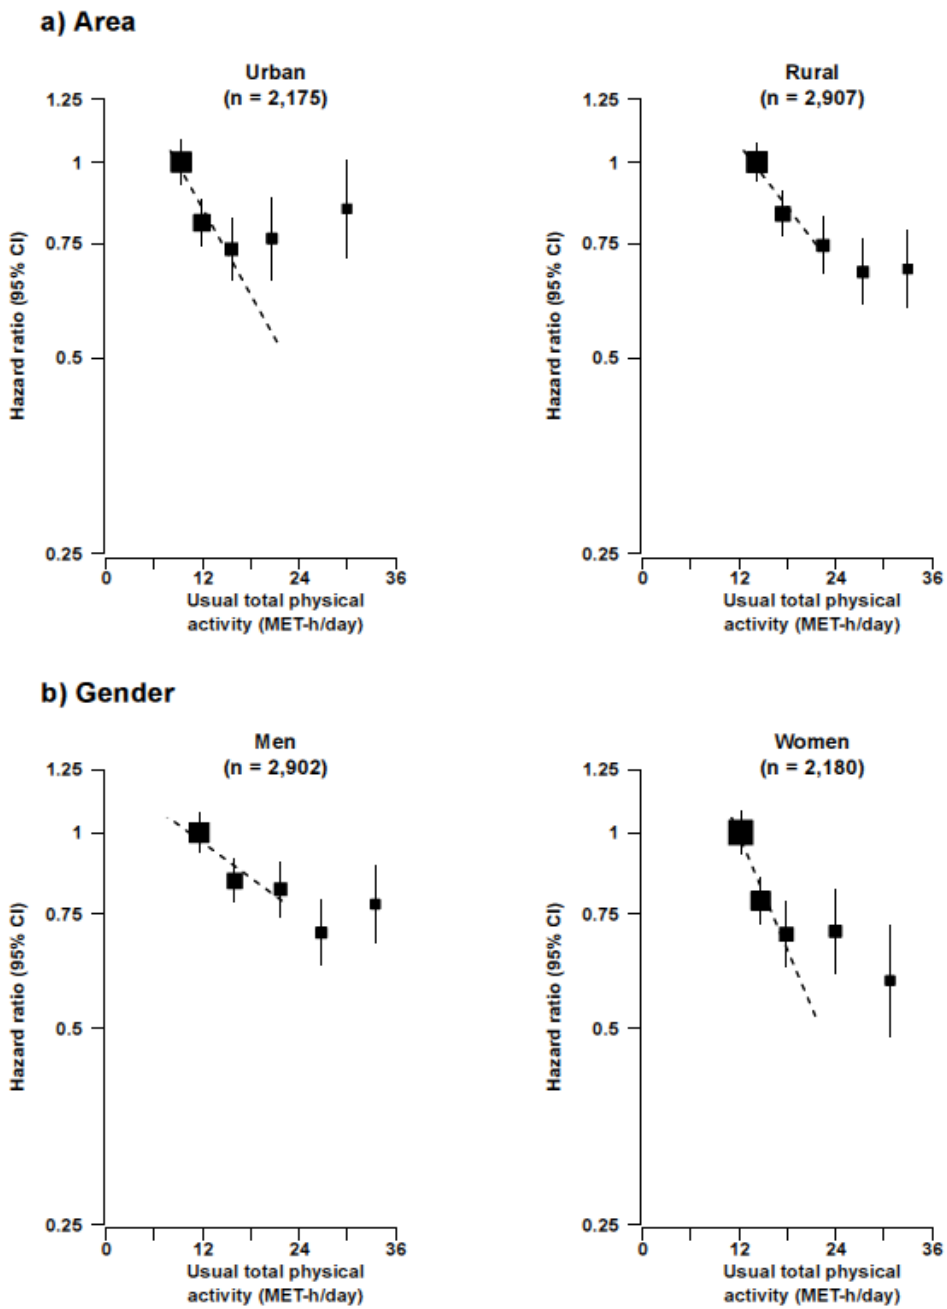

**eFigure 4: Adjusted HRs for ischemic stroke events by total physical activity, stratified by a) area and b) gender**

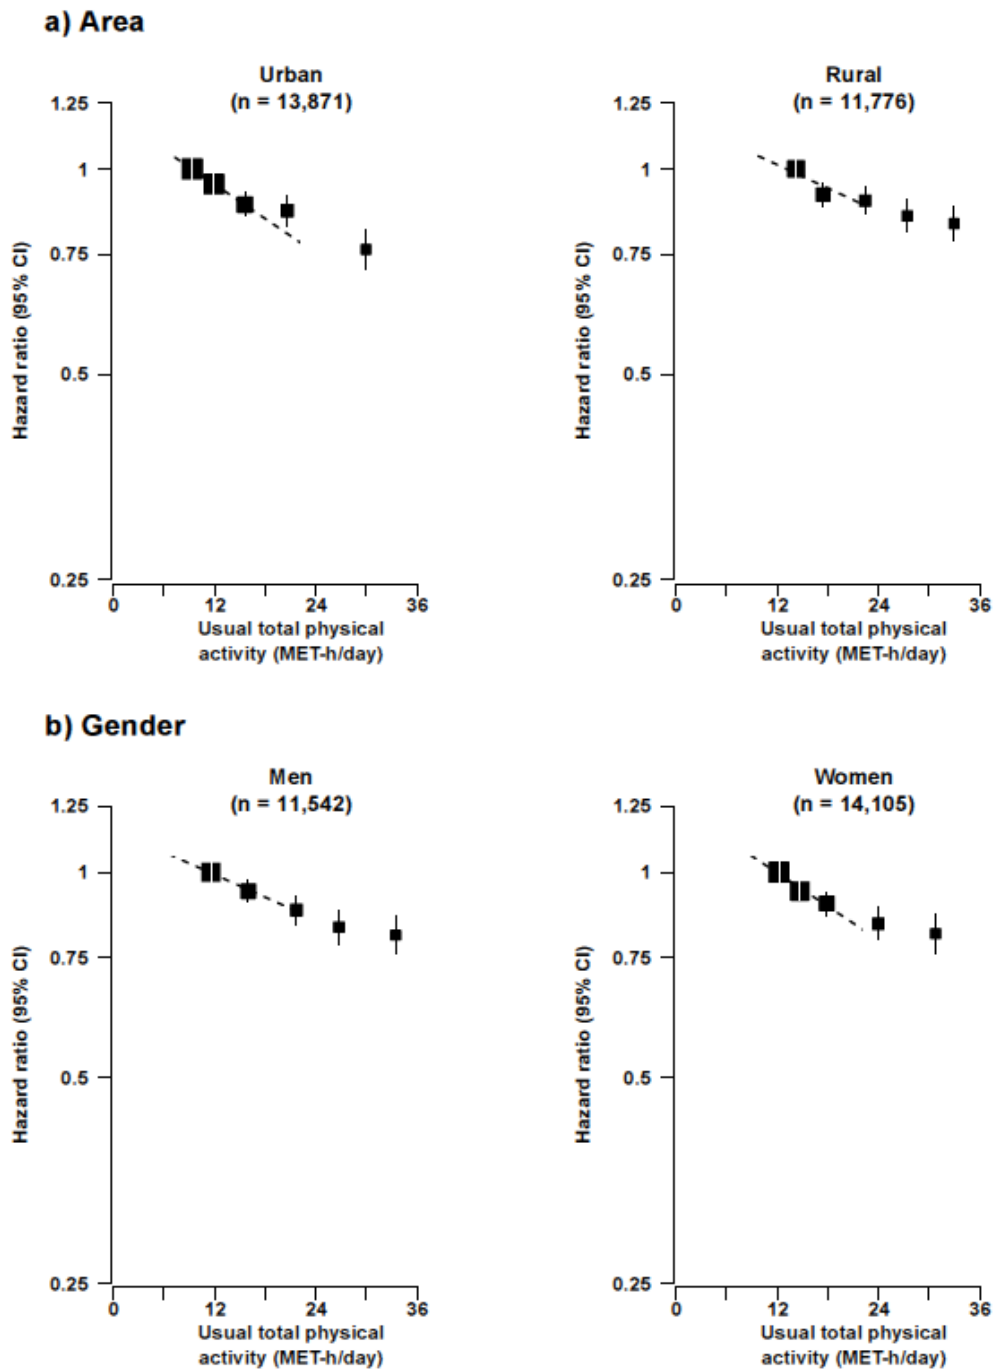

**eFigure 5: Adjusted HRs for intracerebral haemorrhage by total physical activity, stratified by a) area and b) gender**

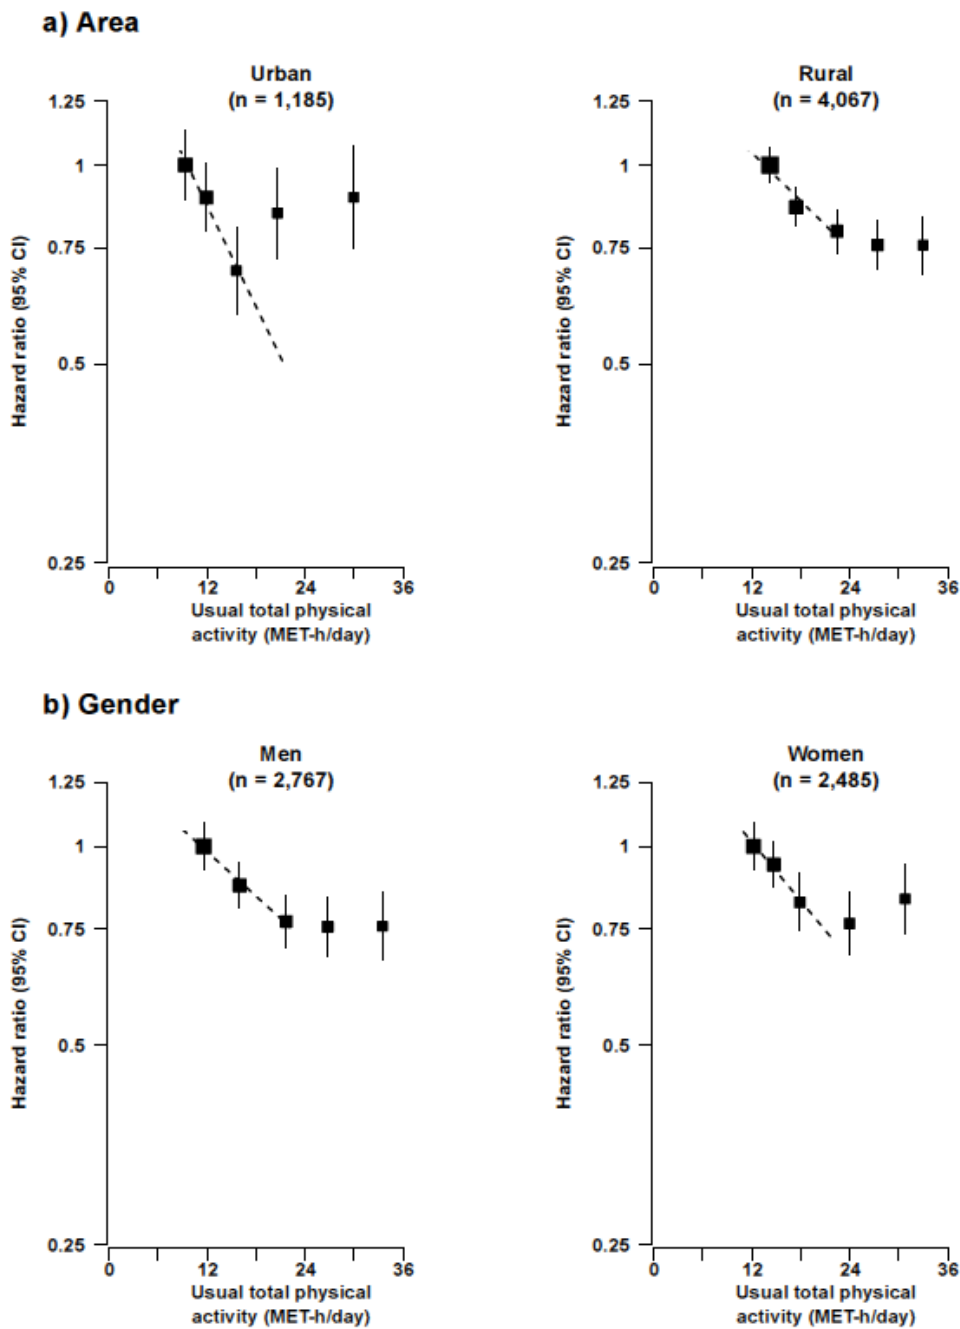

**eFigure 6: Adjusted HRs for cardiovascular death by total physical activity, stratified by a) area and b) gender**

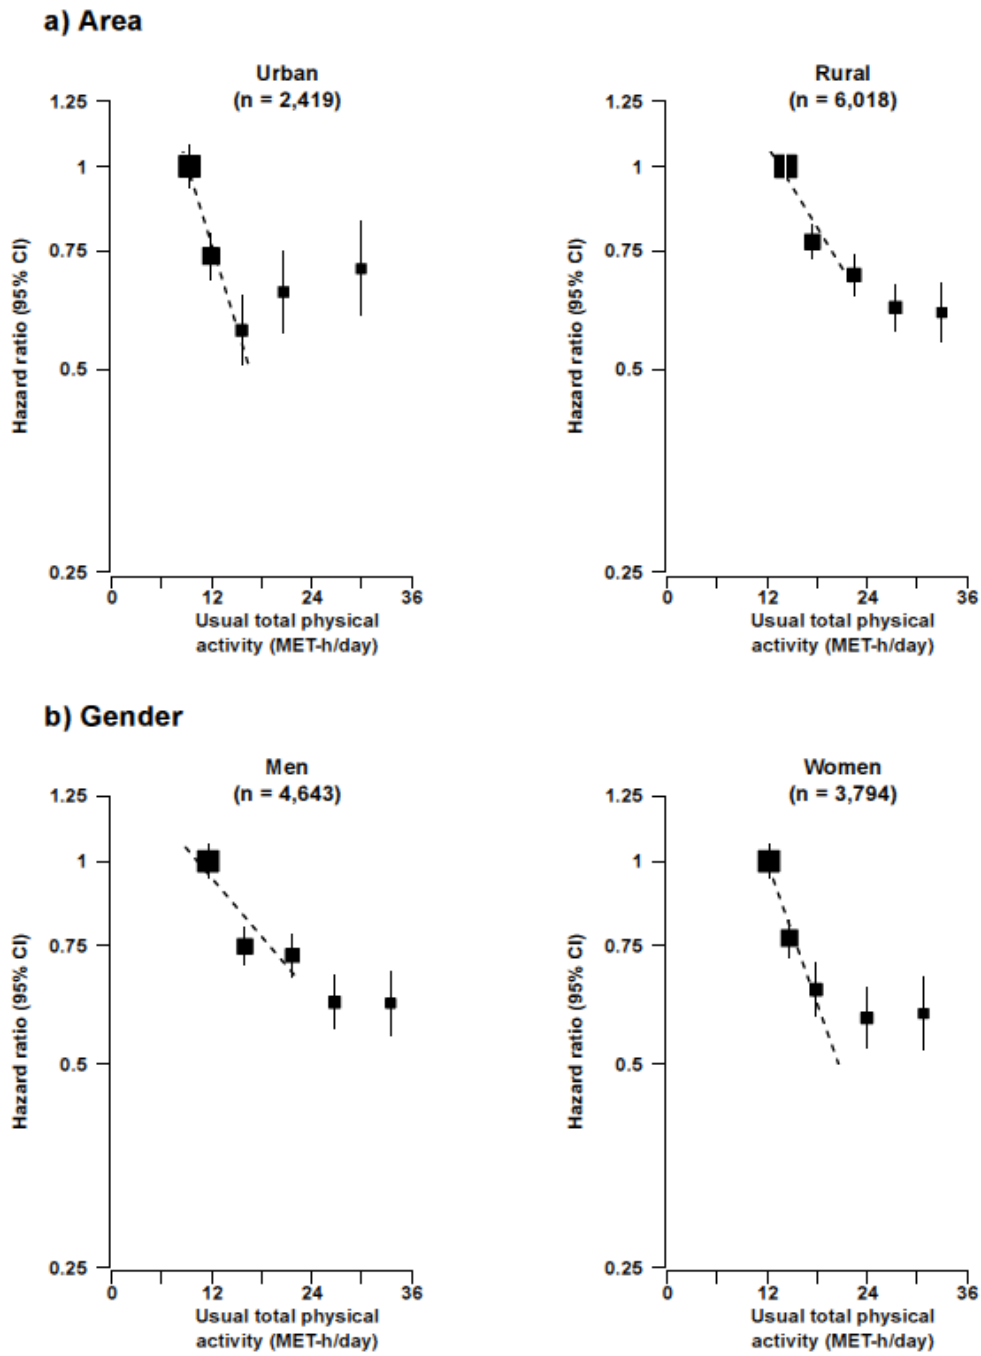

**eFigure 7: Adjusted HRs for major vascular events by a) occupational and b) non-occupational physical activity, in men and women**

**a) Occupational physical activity**

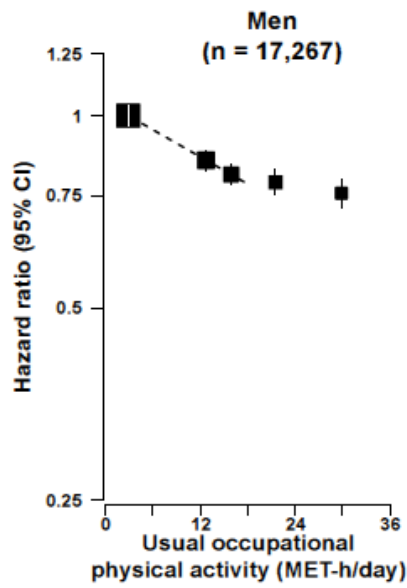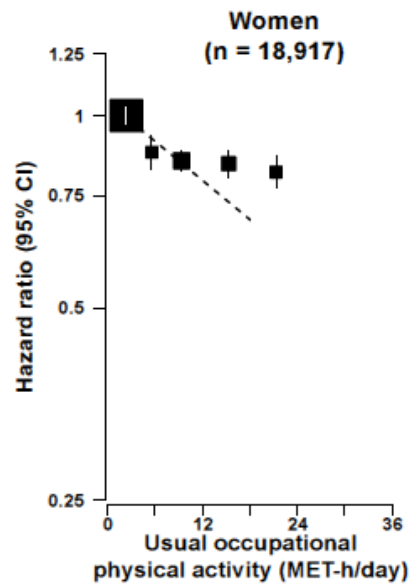

**b) Non-occupational physical activity**

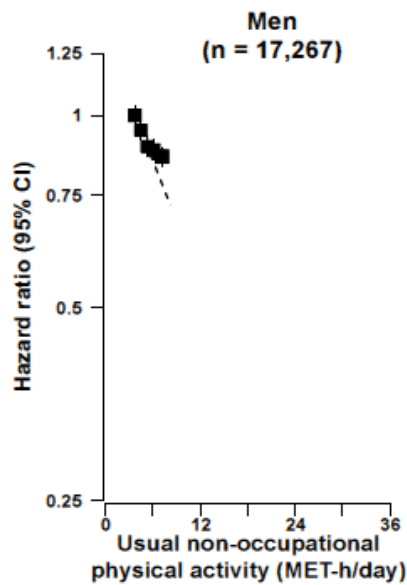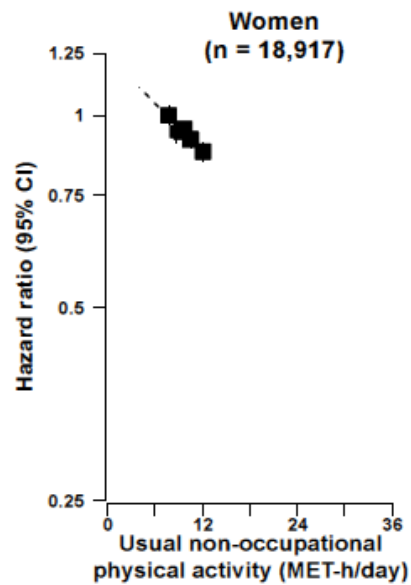



**eFigure 8: Adjusted HRs for major coronary events by a) occupational and b) non-occupational physical activity, in men and women**

**a) Occupational physical activity**

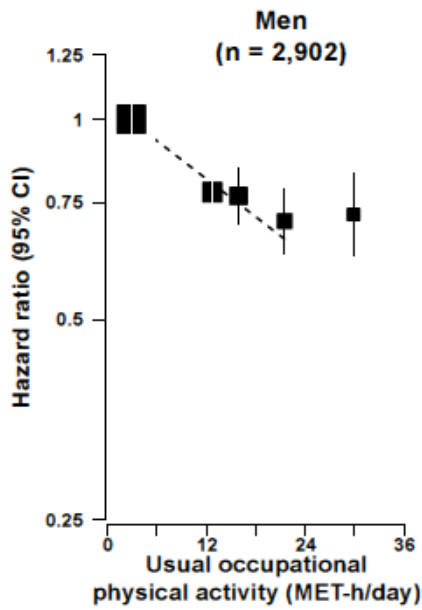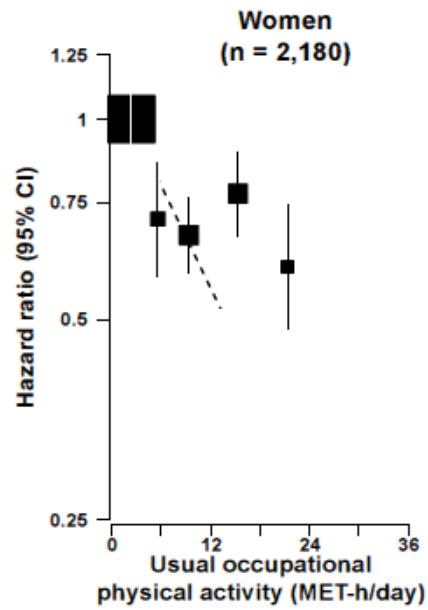

**b) Non-occupational physical activity**

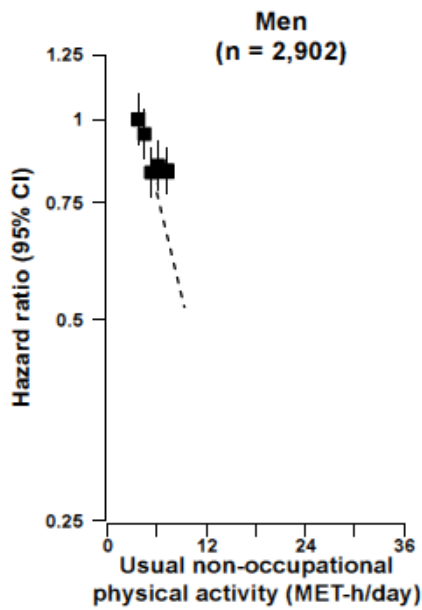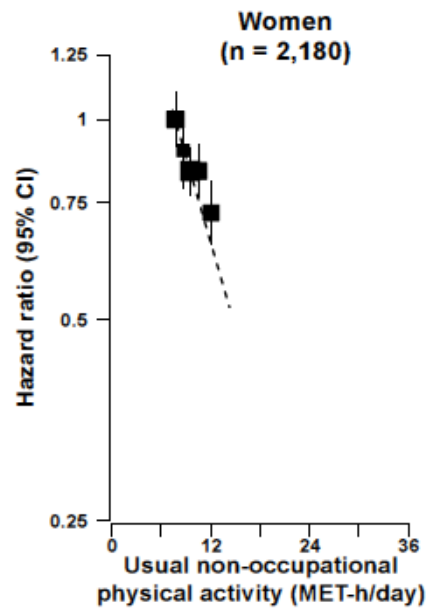

**eFigure 9: Adjusted HRs for ischaemic stroke by a) occupational and b) non-occupational physical activity, in men and women**

**a) Occupational physical activity**

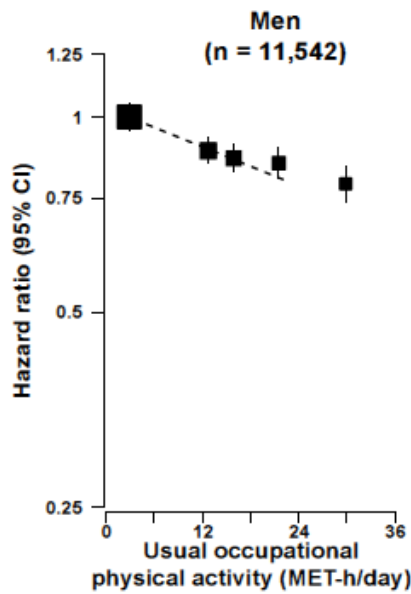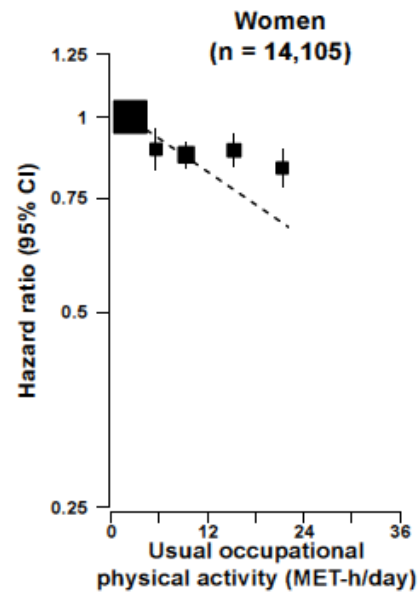

**b) Non-occupational physical activity**

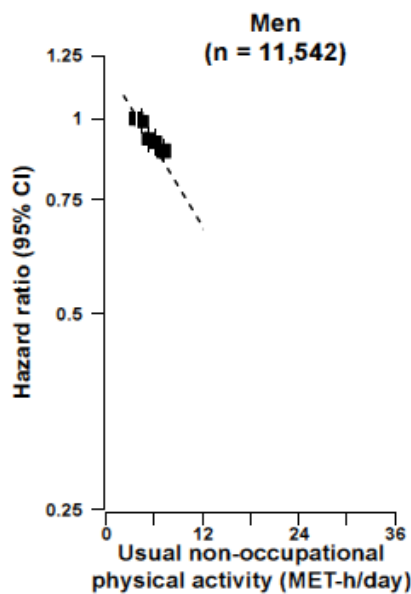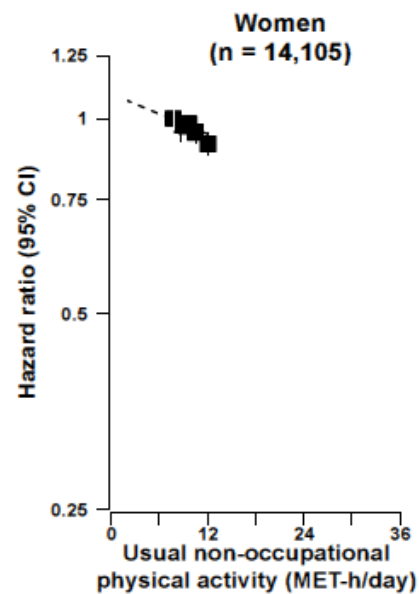

**eFigure 10: Adjusted HRs for intracerebral haemorrhage by a) occupational and b) non-occupational physical activity, in men and women**

**a) Occupational physical activity**

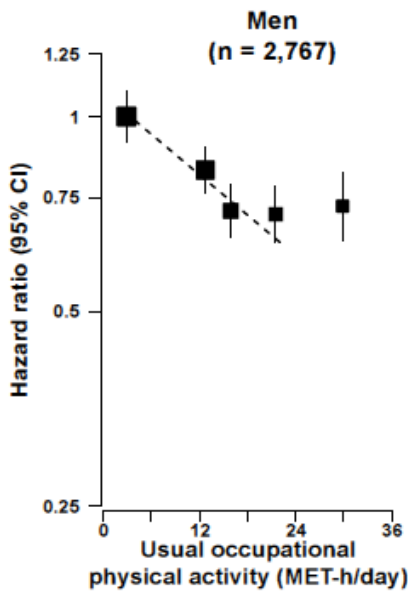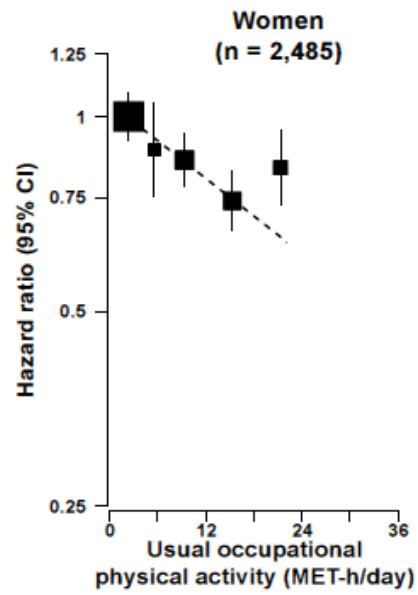

**b) Non-occupational physical activity**

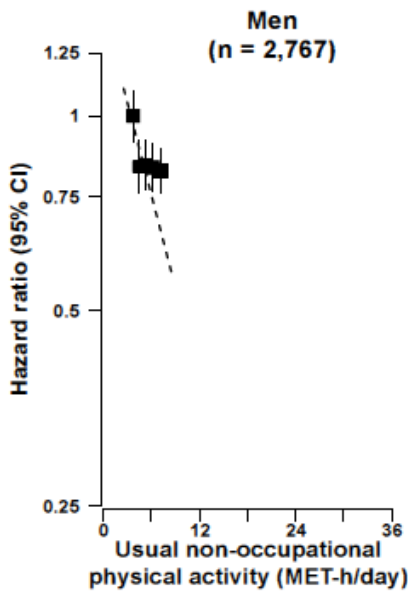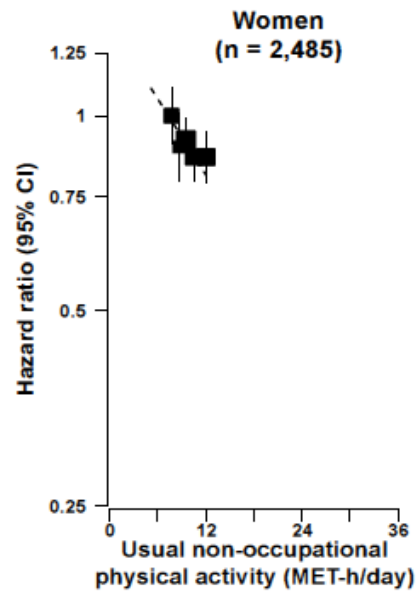

**eFigure 11: Adjusted HRs for fatal cardiovascular disease by a) occupational and b) non-occupational physical activity, in men and women**

**a) Occupational physical activity**

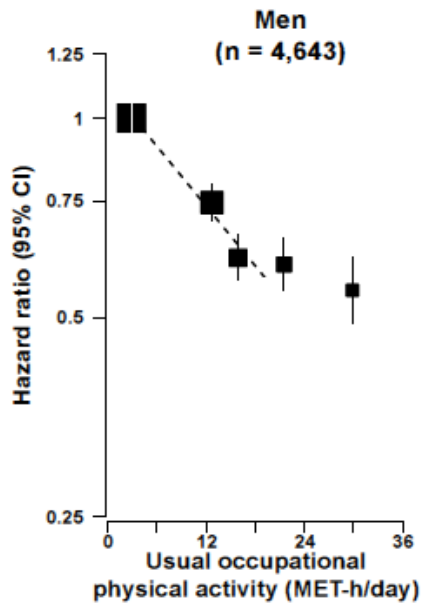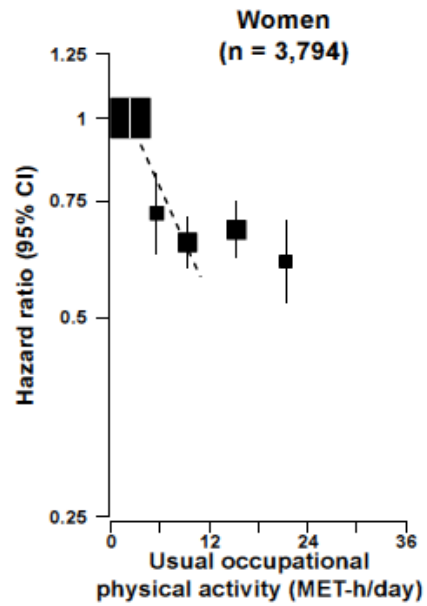

**b) Non-occupational physical activity**

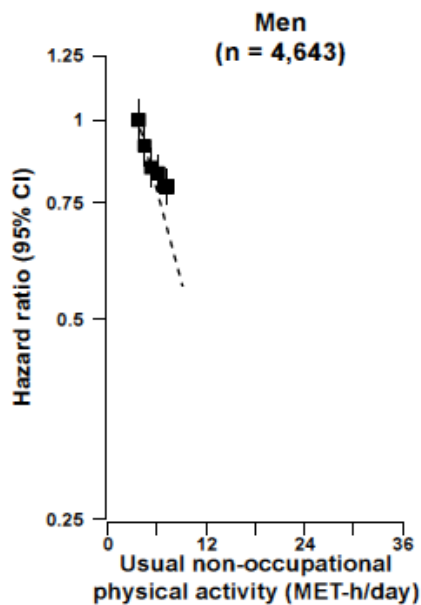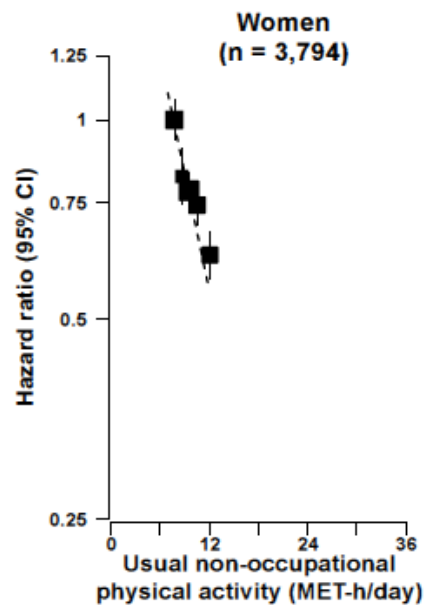

**eFigure 12: Adjusted HRs for major vascular events per 4 MET-h/day higher usual total physical activity by baseline characteristics**

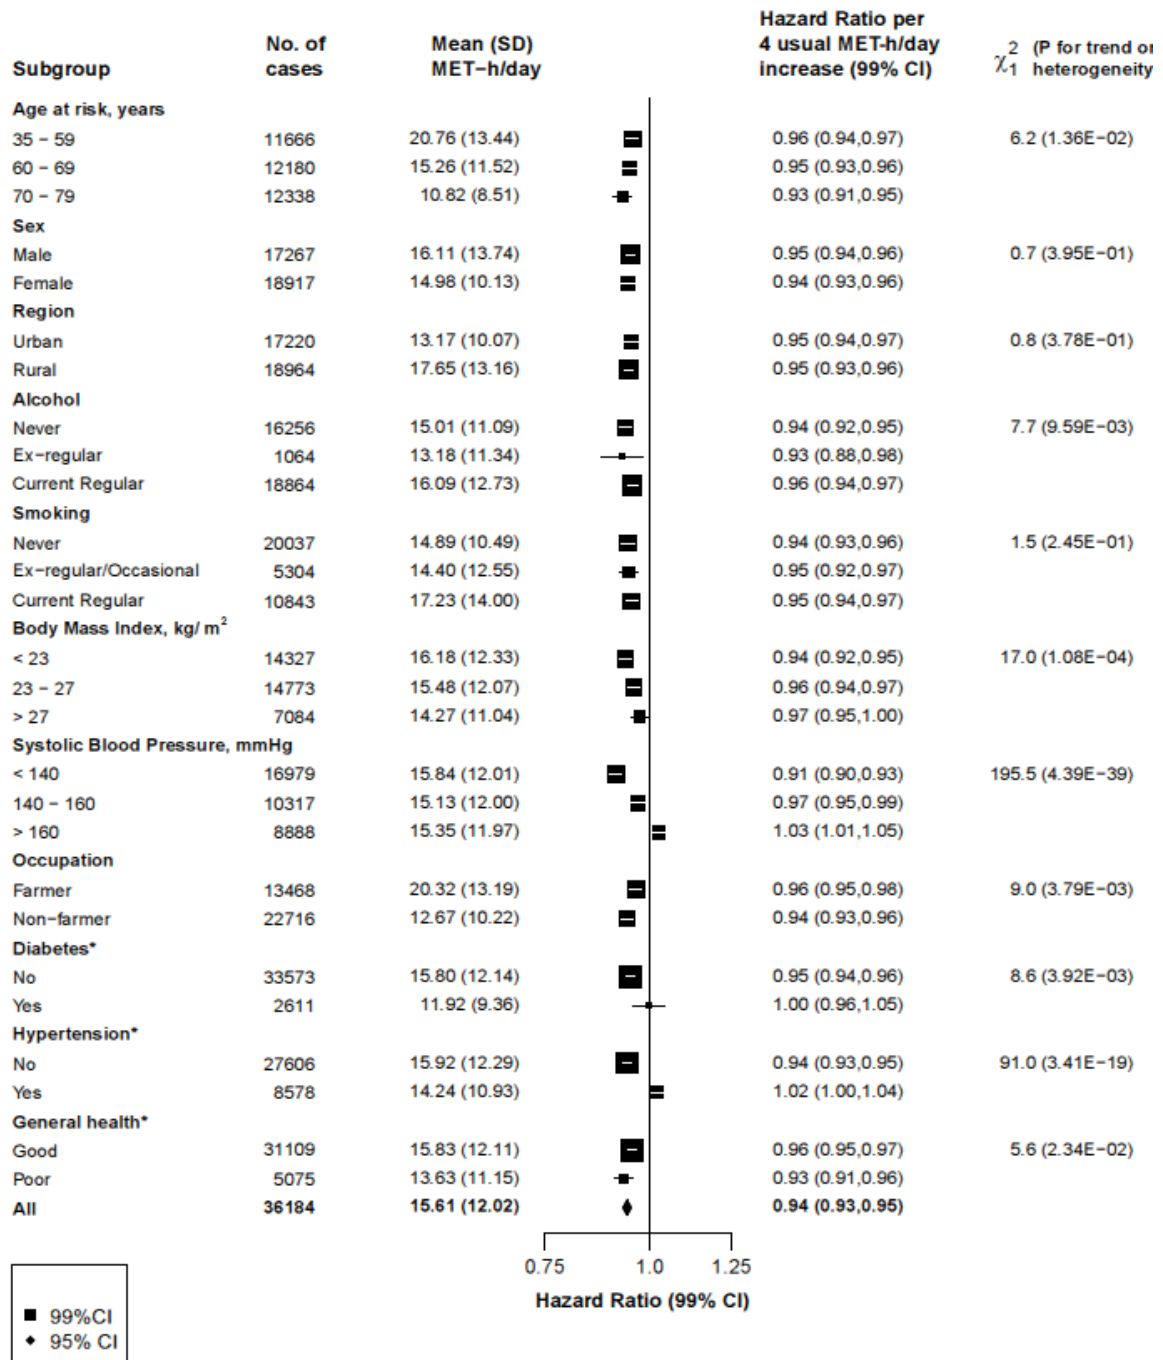

**eFigure 13: Adjusted HRs for a) major coronary events and b) ischemic stroke per 4 MET-h/day higher usual total physical activity by baseline characteristics**

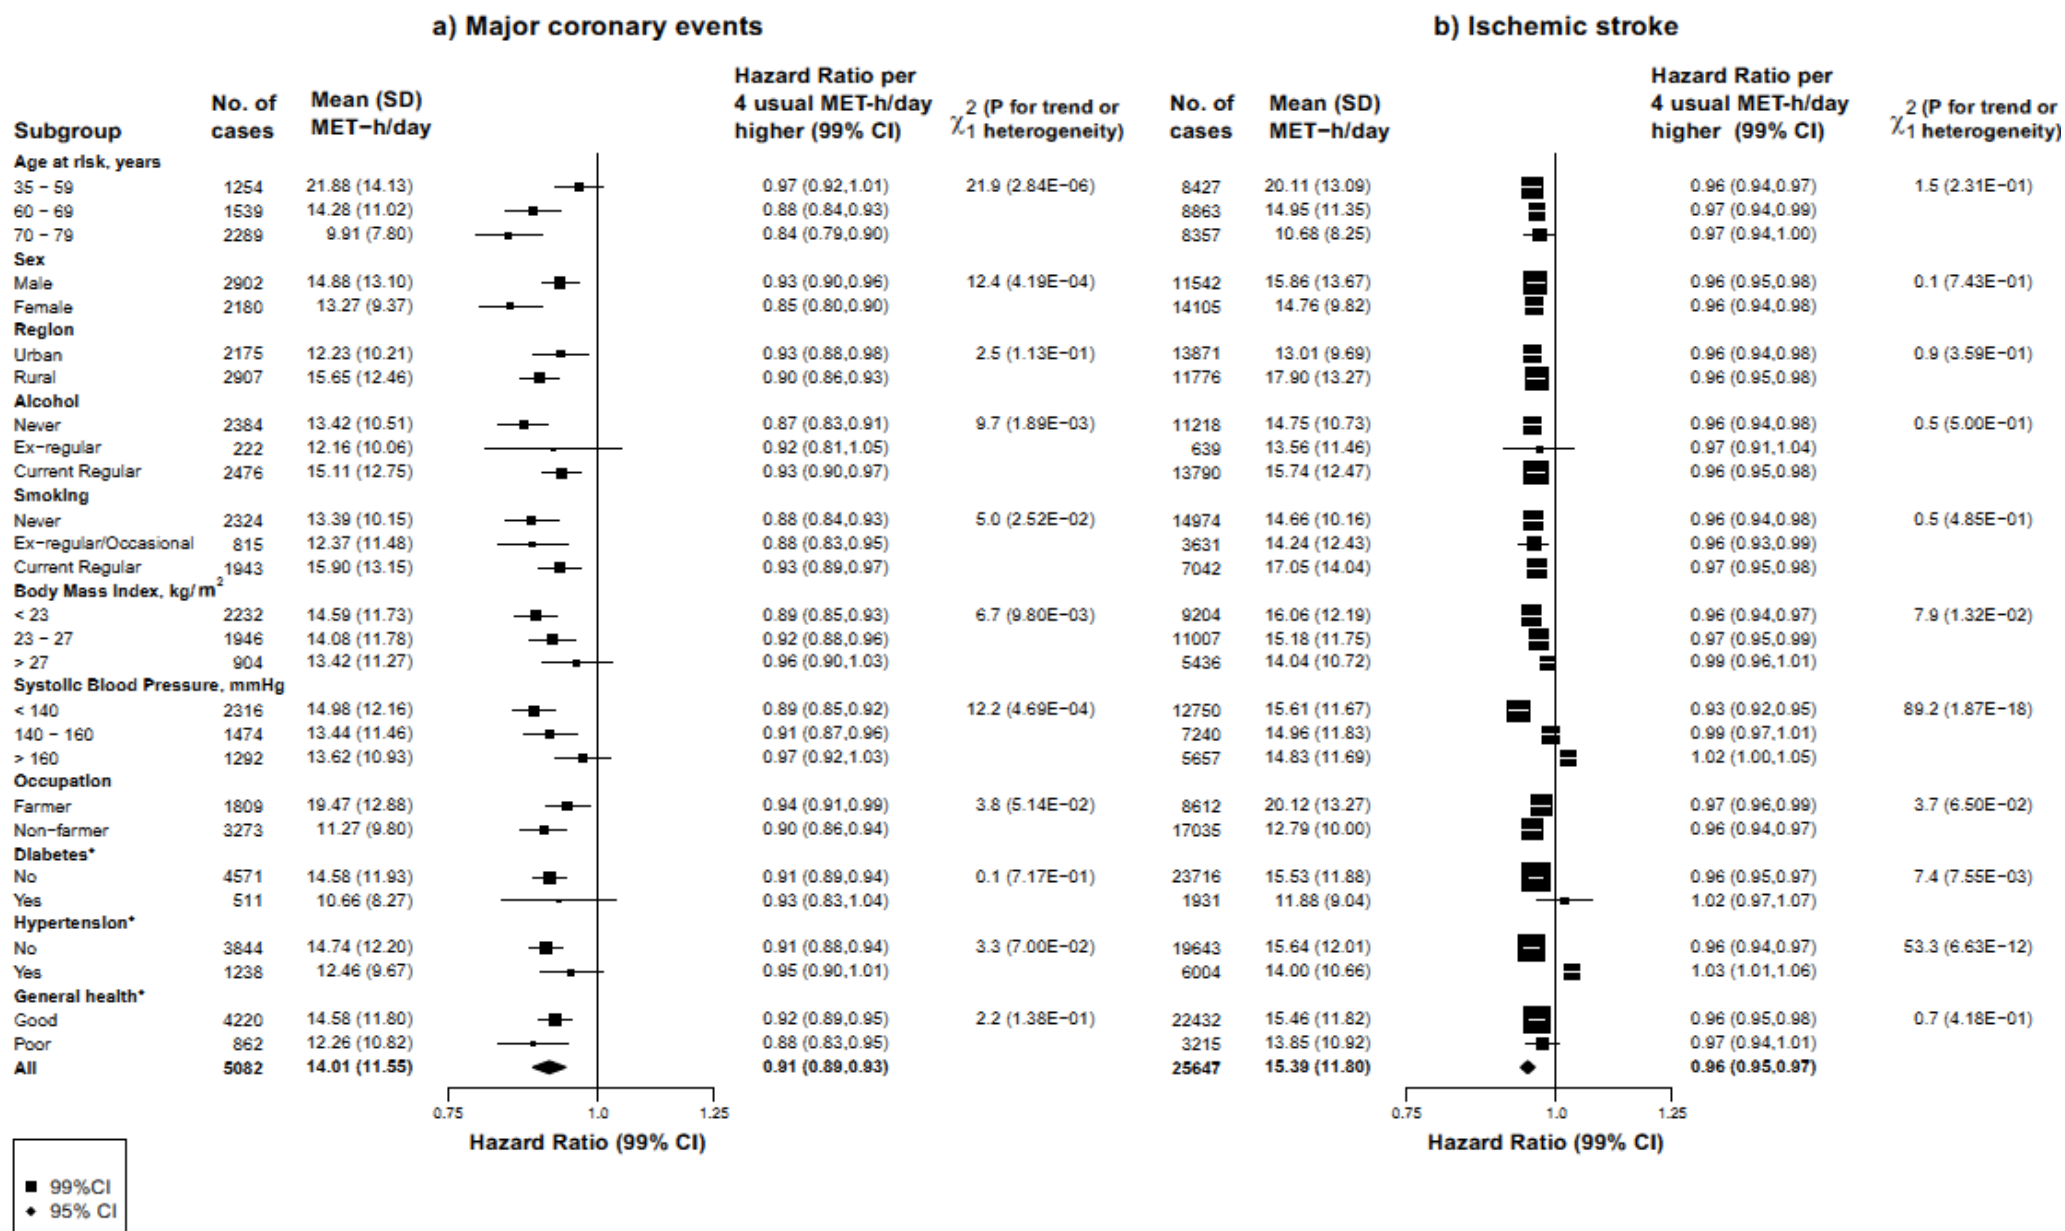

**eFigure 14: Adjusted HRs for a) intracerebral hemorrhage and b) cardiovascular death per 4 MET-h/day higher total physical activity by baseline characteristics**

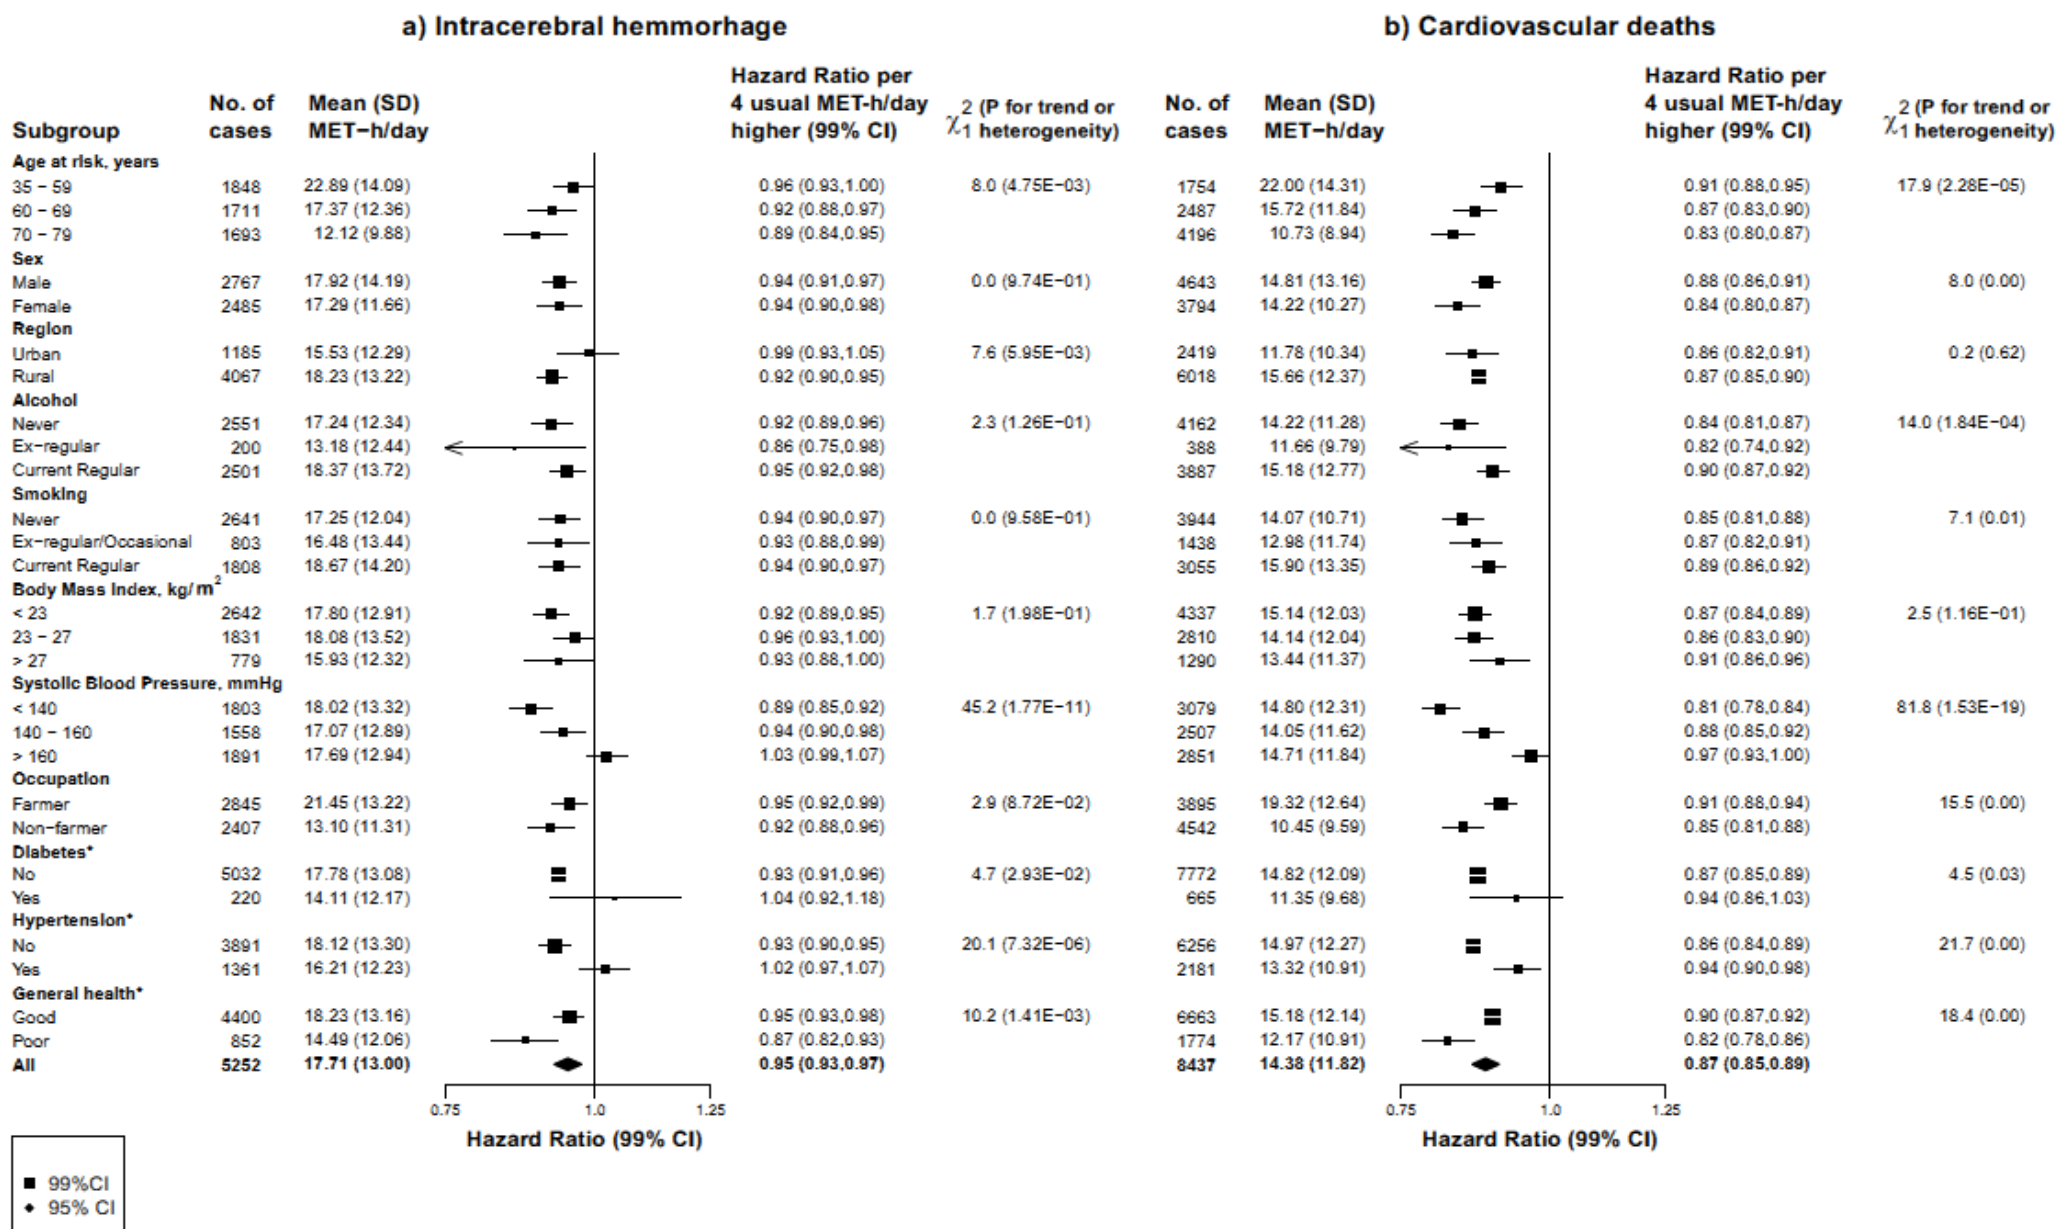



**eFigure 15: Effect on HRs for major vascular events per 4 MET-h/day higher total physical activity sequential adjustment for potential confounders**

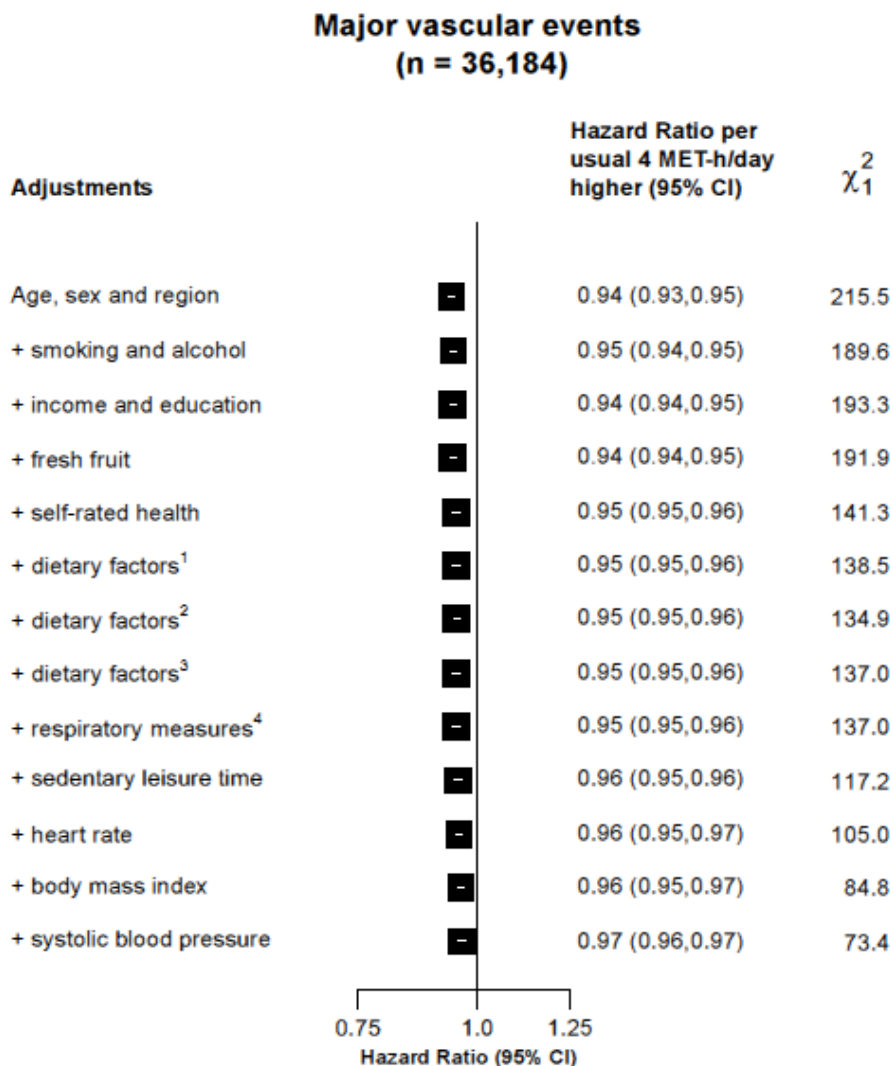

1: Rice, wheat, and staple foods,

2: Meat, poultry, fresh fish, eggs

3: Dairy, soyabean, and preserved vegetables

4: Ratio of forced expiratory volume in 1 second to forced vital capacity
